# Supplementary material for: Convergent behavior of extended stalk regions from staphylococcal surface proteins with widely divergent sequence patterns
Source: PubMed Central journal article supplement — Protein Sci. 2023 Aug 1;32(8):e4707. doi: 10.1002/pro.4707 (PMC10367597; doi:10.1002/pro.4707), 2023-08-01
Supplement: PRO-32-e4707-s001.pdf [file PRO-32-e4707-s001.pdf]

## Supplementary Material

### Convergent behavior of extended stalk regions from staphylococcal surface proteins with widely divergent sequence patterns

Alexander E. Yarawsky<sup>1#</sup>, Andrea L. Ori<sup>1,2†</sup>, Lance R. English<sup>3‡</sup>, Steven T. Whitten<sup>3</sup>, and Andrew B. Herr<sup>1,4,5</sup>

#### Affiliations:

<sup>1</sup> Division of Immunobiology, Cincinnati Children's Hospital Medical Center, Cincinnati, OH 45229, USA

<sup>2</sup> Medical Sciences Baccalaureate Program, University of Cincinnati, Cincinnati, OH 45267, USA

<sup>3</sup> Department of Chemistry and Biochemistry, Texas State University, San Marcos, TX 78666, USA

<sup>4</sup> Division of Infectious Diseases, Cincinnati Children's Hospital Medical Center, Cincinnati, OH 45229, USA

<sup>5</sup> Department of Pediatrics, University of Cincinnati College of Medicine, Cincinnati, OH 45229, USA

# Current affiliation: BioAnalysis, LLC, Philadelphia, PA 19134, USA

† Current affiliation: Graduate Program in Molecular Biophysics, Johns Hopkins University, Baltimore, MD 21218, USA

‡ Current affiliation: Department of Physical Sciences, Temple College, Temple, TX 76502, USA

**Correspondence** to Andrew B. Herr: Division of Immunobiology, Cincinnati Children's Hospital Medical Center, 3333 Burnet Avenue, Cincinnati, OH 45229, USA. [andrew.herr@cchmc.org](mailto:andrew.herr@cchmc.org)

#### Supplementary data files present in this document include:

1. Supplementary Figure S1
2. Supplementary Tables S1—S5

## Supplementary Figure

### Clf-Sdr Family

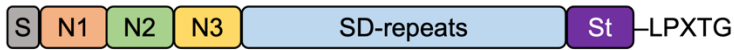

ClfA, ClfB  
SdrC, SdrD, SdrE, SdrF, SdrG, SesJ

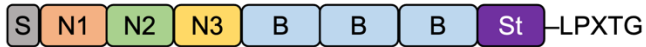

CNA

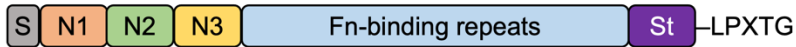

FnBPA, FnBPB

### G5-E Family

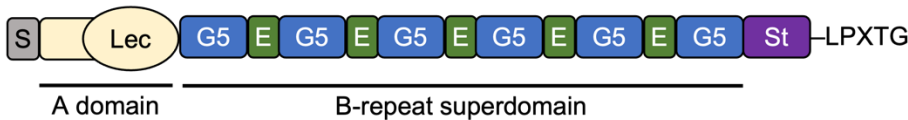

Aap, SasG, Pls

### SRRP Family

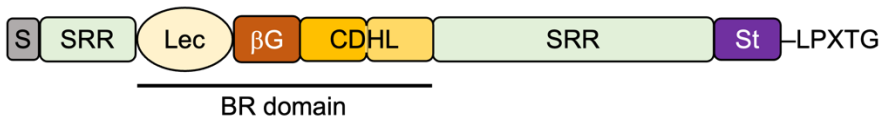

SraP

### Other

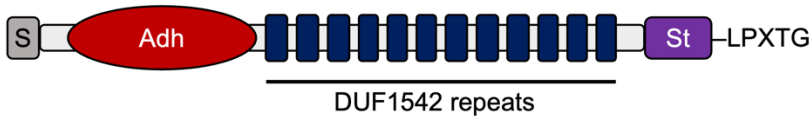

FmtB (SasB), SasC

### Figure S1. Domain organization of adhesin-like CWA protein families.

The major families and sub-families of staphylococcal adhesin-like CWA proteins are illustrated with the representative proteins from each family listed on the right. The gray S box represents the signal sequence. The purple St box is the stalk region, although the nature of this region varies per protein and may have distinct characteristics even within a family, as defined in Table 3. For example, CNA is in the Clf-Sdr family but it has a Pro-rich stalk region; likewise, Pls is in the G5-E family but is has a SD-rich stalk, unlike Aap and SasG. The LPXTG motif at the C-terminus of each protein is the sortase anchor sequence that is covalently attached to the cell wall of the staphylococcal cell. In the Clf-Sdr family, N1, N2, and N3 domains together form the A region; the N2 and N3 domains adopt Ig-like folds that interact with ligands via the 'dock, lock, and latch' mechanism. Lec stands for the lectin domains of Aap, SasG, Pls, and SraP. The B-repeat superdomain of Aap, SasG, and Pls is made up of tandem B-repeats, each of which comprises a G5 and E subdomain. The SRRP family (serine-rich repeat proteins) such as SraP contain serine-rich repeats (SRR), a lectin domain, a  $\beta$ -grasp ( $\beta$ G) fold domain, and two cadherin-like (CDHL) domains. The Other family contains FmtB (SasB) and SasC, which share a distinct domain arrangement with an adhesion domain followed by several DUF1542 repeats.

## Supplementary Tables

**Table S1. Sequence parameters for IDP constructs.**

| Parameter         | Aap-PGR  | SasG-PGR | Aap-Arpts | SdrC-SD  | SD-30mer |
|-------------------|----------|----------|-----------|----------|----------|
| N                 | 135      | 69       | 189       | 62       | 30       |
| f-                | 0.15556  | 0.13043  | 0.22222   | 0.33871  | 0.50000  |
| f+                | 0.1037   | 0.23188  | 0.06878   | 0.08065  | 0        |
| FCR               | 0.25926  | 0.36232  | 0.29101   | 0.41935  | 0.50000  |
| NCPR              | -0.05185 | 0.10145  | -0.15344  | -0.25806 | -0.50000 |
| Kappa             | 0.05825  | 0.09562  | 0.08655   | 0.30207  | 0.02324  |
| SCD               | 0.79     | 1.11     | 15.80     | 4.06     | 10.79    |
| FPR               | 0.28889  | 0.17391  | 0.09524   | 0.03226  | 0        |
| Omega             | 0.03234  | 0.07106  | 0.05146   | 0.00657  | 0.00096  |
| Hydropathy        | 3.09259  | 2.72899  | 3.08466   | 2.64839  | 2.35     |
| Phase Plot Region | 2        | 3        | 2         | 3        | 4        |

The CIDER server <sup>1</sup> was used to calculate most parameters, including those required for the Das-Pappu Plot <sup>2</sup>; SCD was calculated as described <sup>3</sup>.

**N:** Number of residues

**f-:** Fraction of negative residues

**f+:** Fraction of positive residues

**FCR:** Fraction of charged residues

**NCPR:** Net charge per residue

**Kappa:**  $\kappa$  is a charge patterning parameter <sup>2</sup>. Highly mixed charged sequences approach  $\kappa = 0$ , while highly segregated charged sequences approach  $\kappa = 1$ .

**SCD:** Sequence charge decoration <sup>3</sup>. Well-mixed charged sequences approach SCD = 0, whereas highly segregated charged sequences show large values of SCD.

**FPR:** Fraction of proline residues (not a parameter provided by CIDER, but included here for relevance)

**Omega:**  $\Omega$  is a charge/proline patterning parameter <sup>4</sup>. This parameter is similar to  $\kappa$ , but also incorporates proline residues. If prolines and charged residues are well mixed along a sequence (with respect to other amino acids), there will be a low  $\Omega$  value. If proline/charged residues are highly segregated,  $\Omega$  will approach 1.

**Hydropathy:** Based on the Kyte-Doolittle scale <sup>5</sup>, normalized from 0 (least hydrophobic) to 9 (most hydrophobic).

**Phase Plot Region:** Location on the Das-Pappu phase plot this sequence falls

**Phase Plot Annotation:**

1: Weak polyampholytes and polyelectrolytes (Globules & Tadpoles)

2: Boundary region (Janus sequences)

3: Strong polyampholytes

4: Strong negatively charged polyelectrolytes

5: Strong positively charged polyelectrolytes

**Table S2. Calculated and predicted parameters of IDP constructs.**

| IDP       | N   | Net charge | $R_h$ (coil) | $R_h$ (PPII) | $R_h$ (PPII charge) | $f_{\text{PPII}}$ |
|-----------|-----|------------|--------------|--------------|---------------------|-------------------|
| Aap-PGR   | 135 | -7         | 25.64        | 38.50        | 37.84               | 0.5350            |
| SasG-PGR  | 69  | +7         | 18.27        | 24.56        | 24.43               | 0.4761            |
| Aap-Arpts | 189 | -29        | 30.38        | 41.26        | 44.06               | 0.4190            |
| SdrC-SD   | 62  | -16        | 17.31        | 20.64        | 22.15               | 0.3294            |
| SD-30mer  | 30  | -15        | 12.01        | 13.45        | 15.16               | 0.2700            |

The number of residues is listed in the N column.  $R_h$  is the predicted hydrodynamic radius (in Å) assuming complete random coil ( $R_h$  (coil)), considering intrinsic propensities for the polyproline type-II helix backbone conformation ( $R_h$  (PPII)) or contributions from both PPII propensity and the net charge ( $R_h$  (PPII charge)). The predicted fraction of PPII ( $f_{\text{PPII}}$ ) refers to the number of residues predicted to be in the PPII conformation divided by the total number of residues. All parameters were calculated using a program based on Tomasso, et al. <sup>6</sup>. Net charge contributions to the  $R_h$  were established empirically in English, et al. <sup>7</sup>

**Table S3. Sequence-based parameters of IDP dataset.** The dataset is reproduced from Tomasso, et al. <sup>6</sup>. Parameters listed here were calculated using a program provided by Steven Whitten, based on Tomasso, et al. <sup>6</sup>. Shaded IDPs are from the current study. IDPs are sorted by descending  $f_{\text{PPII}}$ .

| IDP                   | N   | Net charge | $R_h$ (coil) | $R_h$ (PPII) | $R_h$ (PPII charge) | $R_h^a$ (experimental) | $f_{\text{PPII}}$ |
|-----------------------|-----|------------|--------------|--------------|---------------------|------------------------|-------------------|
| Aap-PGR               | 135 | -7         | 25.64        | 38.50        | 37.84               | 37.06                  | 0.5350            |
| p53(1-93)             | 93  | -15        | 21.24        | 29.51        | 30.56               | 32.4                   | 0.4890            |
| SasG-PGR              | 69  | +7         | 18.27        | 24.56        | 24.43               | 24.8                   | 0.4761            |
| p53(1-93) ALA-        | 93  | -15        | 21.24        | 28.66        | 29.70               | 30.4                   | 0.4581            |
| p53 TAD               | 73  | -14        | 18.80        | 24.79        | 25.84               | 23.8                   | 0.4500            |
| Aap-Arpts             | 189 | -29        | 30.38        | 41.26        | 44.06               | 40.8                   | 0.4190            |
| Securin               | 202 | -1         | 31.41        | 42.57        | 40.45               | 39.7                   | 0.4130            |
| PDE- $\gamma$         | 87  | +4         | 20.54        | 26.51        | 25.70               | 24.8                   | 0.4122            |
| Cad136                | 136 | +9         | 25.73        | 33.77        | 33.45               | 28.1                   | 0.4025            |
| HIF1- $\alpha$ -403   | 202 | -29        | 31.41        | 42.13        | 44.86               | 44.3                   | 0.4024            |
| Tau-K45               | 198 | +19        | 31.10        | 41.52        | 42.53               | 45                     | 0.3988            |
| HIF1- $\alpha$ -530   | 170 | -10        | 28.80        | 37.81        | 37.44               | 38.3                   | 0.3899            |
| Fos-AD                | 168 | -16        | 28.62        | 37.17        | 37.84               | 35                     | 0.3783            |
| ShB-C                 | 146 | -4         | 26.67        | 34.32        | 33.06               | 32.9                   | 0.3764            |
| $\alpha$ -synuclein   | 140 | -9         | 26.11        | 33.47        | 33.12               | 28.2                   | 0.3744            |
| Mlph(147-403)         | 260 | -28        | 35.68        | 47.00        | 49.24               | 49                     | 0.3703            |
| CFTR-R-region         | 189 | -5         | 30.38        | 39.18        | 37.82               | 32                     | 0.3644            |
| p57-ID                | 73  | -6         | 18.80        | 23.14        | 22.80               | 24                     | 0.3636            |
| prothymosin- $\alpha$ | 110 | -43        | 23.12        | 29.02        | 34.77               | 33.7                   | 0.3633            |
| LJIDP1                | 94  | +4         | 21.36        | 26.46        | 25.59               | 24.52                  | 0.3565            |
| Mlph(147-240)         | 97  | -15        | 21.70        | 26.85        | 27.86               | 28                     | 0.3528            |
| SNAP25                | 206 | -14        | 31.73        | 40.60        | 40.70               | 39.7                   | 0.3513            |
| Hdm2-ABD              | 97  | -29        | 21.70        | 26.47        | 29.91               | 25.7                   | 0.3345            |
| SdrC-SD               | 62  | -16        | 17.31        | 20.64        | 22.15               | 21.1                   | 0.3294            |
| Vmw65                 | 89  | -19        | 20.78        | 25.13        | 26.90               | 28                     | 0.3278            |
| p53(1-93) PRO-        | 93  | -15        | 21.24        | 24.93        | 25.97               | 27.4                   | 0.2832            |
| SD-30mer              | 30  | -15        | 12.01        | 13.45        | 15.16               | ND <sup>b</sup>        | 0.2700            |

<sup>a</sup> Reported in Å. Values in gray cells were as determined in this manuscript or <sup>8</sup>; values in white cells are reproduced from <sup>6</sup>.

<sup>b</sup> ND, not determined.

**Table S4. The sequence of IDPs used in PPII and  $R_h$  predictions.** IDP sequences (other than those from the current study - shaded) are from Tomasso, et al. supplementary material <sup>6</sup>.

| IDP                   | Sequence                                                                                                                                                                                                                                                                             |
|-----------------------|--------------------------------------------------------------------------------------------------------------------------------------------------------------------------------------------------------------------------------------------------------------------------------------|
| p53(1-93)             | MEEPQSDPSVEPPLSQETFSDLWKLLPENNVLSPLPSQAMDDLMLS<br>PDDIEQWFTEDPGPDEAPRMPEAAPPVAPAPAAPTPAAPAPAPSW<br>PL                                                                                                                                                                                |
| p53(1-93) ALA-        | MEEPQSDPSVEPPLSQETFSDLWKLLPENNVLSPLPSQGMDLMLS<br>PDDIEQWFTEDPGPDEGPRMPEGGPPVGGPGGGPTGGGPGGPS<br>WPL                                                                                                                                                                                  |
| p53(1-93) PRO-        | MEEGQSDGSVEGGLSQETFSDLWKLLGENNVLSGLGSQAMDDLML<br>SGDDIEQWFTEDGGGDEAGRMGEAAGGVAGAGAAGTGAAGAGAG<br>SWGL                                                                                                                                                                                |
| p53 TAD               | MEEPQSDPSVEPPLSQETFSDLWKLLPENNVLSPLPSQAMDDLMLS<br>PDDIEQWFTEDPGPDEAPRMPEAAPRV                                                                                                                                                                                                        |
| Vmw65                 | GSAGHTRRLSTAPPTDVSLGDELHLDGEDVAMAHADALDDFDLDM<br>LGDGDSPPGPGFTPHDSAPYGALDMADFEFEQMFTDALGIDEYGG                                                                                                                                                                                       |
| Hdm2-ABD              | ERSSSSESTGTPSNPDLDAGVSEHSGDWLDQDSVSDQFSVEFEVE<br>SLDSEDYSLSEEGQELSDDEDDEVYQVTVYQAGESDTSFEEDPEIS<br>LADYWK                                                                                                                                                                            |
| prothymosin- $\alpha$ | MSDAAVDTSSEITTKDLKEKKEVVEEAENGRDAPANGNANEENGEQ<br>EADNEVDEEEEEEGEEEEEEEEEGDGEEEDGDEDEEAESATGKRAA<br>EDDEDDVDTKKQKTDEDD                                                                                                                                                               |
| HIF1- $\alpha$ -403   | PAAGDTIISLDFGSNDTETDDQQLEEVPLYNDVMLPSPNEKLQINLA<br>MSPLPTAETPKPLRSSADPALNQEVALKLEPNPESLELSFTMPQIQD<br>QTPSPSDGSTRQSSPEPNPSEYCFYVDSDMVNEFKLELVEKLF<br>AE DTEAKNPFSTQDLDLEMLAPYIPMDDDFQLRSFDQLSPLESSSAS<br>PESASPQSTVTVFQ                                                              |
| Fos-AD                | GSHMSVASLDLTGGLPEVATPESEEAFTLPLLNDPEPKPSVEPVKSI<br>SSMELKTEPFDDFLFPASSRPSGSETARVPMDLSGSFYAADWEP<br>LHSGSLGMGPMATELEPLCTPVVTCTPSCTAYTSSVFVTYPEADSFP<br>SCAAHRKGGSSNEPSSDSLSSPTLLAL                                                                                                    |
| Mlph(147-240)         | RLQGGGGSEPSLEENGNDSEQTDEDGDLDEARDQPLNSKKKKR<br>LSFRDVFEEEDSDHLVQPCSQTLGLSSVPESAHSLSLSGEPYSED<br>TTSLEP                                                                                                                                                                               |
| Tau-K45               | MSSPGSPGTPGSRRTPSLPTPPTREPKKVAVVRTPPKSPSSAKSR<br>LQTAPVPMPLKKNVSKIGSTENLKHQPGGGKVQIINKKLDLSNVQS<br>KCGSKDNIKHVPGGGSVQIVYKPVLDLSKVTSCGSLGNIHHKPGGG<br>QVEVKSEKLDKDRVQSKIGSLDNITHVPGGGNKKIETHKLTFR<br>ENAKAKTDHGAEIVY                                                                  |
| Mlph(147-403)         | RLQGGGGSEPSLEENGNDSEQTDEDGDLDEARDQPLNSKKKKR<br>LSFRDVFEEEDSDHLVQPCSQTLGLSSVPESAHSLSLSGEPYSED<br>TTSLEPEGLEETGARALGCRPSPEVQPCSPSPGEDAHAELDSPAA<br>SCKSAFGTTAMPGTDDVRGKHLPSQYLADVDTSDSDSIQGPRAASQ<br>HSKRRARTVPETQILELNKRMSAVEHLLVHLENTVLPESAQEP<br>TVET HPSADTEEETLRRRLEELTSNIGSSTSSE |
| p57-ID                | VRTSACRSLFGPVDHEELSRELQARLAELNAEDQNRWDYDFQ<br>QDM PLRGPGRQLQWTEVDSDSVPAFYRETVQV                                                                                                                                                                                                      |
| PDE- $\gamma$         | MNLEPPKAEIRSATRVMGPPVTPRKGPPKFKQRQTRQFKSKPPKK<br>GVQGGFGDDIPGMEGLGTDITVICPWEAFNHLELHELAQYGI                                                                                                                                                                                          |







|                                       |                                                                                                                                                                                                                                           |
|---------------------------------------|-------------------------------------------------------------------------------------------------------------------------------------------------------------------------------------------------------------------------------------------|
|                                       | ESTSESDSESHSDSESDSDSESTSESDSESHSDSESDSDSESTSESGSESHSNS<br>E                                                                                                                                                                               |
| <i>Pro-rich LCRs</i>                  |                                                                                                                                                                                                                                           |
| Aap <sup>a</sup><br>( <i>S. epi</i> ) | PTKAEPGKPAEPGKPAEPGKPAEPGTPAEPGKPAEPGTPAEPGKPAEPGKPAEP<br>GKPAEPGKPAEPGTPAEPGTPAEPGKPAEPGTPAEPGKPAEPGTPAEPGKPAES<br>GKPVETGTPAQSGAPEQPNRSMHSTDNKNQ                                                                                        |
| SasG                                  | PKDPKGPENPEKPSRPTHPSGPVNPNNPGLSKDRAKPNGPVHSMKNDKVKKS<br>KIAKESVANQEKKRAE                                                                                                                                                                  |
| CNA                                   | PEKPNKPIYPEKPKDKTPPNKPDHSNKVRPTPPDEPSKVDKVDQPKDNKTKPENP<br>LKE                                                                                                                                                                            |
| FnbpA                                 | PPIVPPTPPTPEVPSEPETPTPPTPEVPSEPETPTPPTPEVPSEPETPTPPTPEVPA<br>EPGKPVPPAKEEPKKPSKPVEQGVVTPVIEINEKVKAVAPTCKKQSKKSE                                                                                                                           |
| FnbpB                                 | PPIVPPTPPTPEVPSEPETPTPPTPEVPSEPETPTPPTPEVPTEPGKPIPPAKEEPK<br>KPSKPVEQGVVTPVIEINEKVKAVVPTKKAQSKKSE                                                                                                                                         |
| <i>Other LCRs</i>                     |                                                                                                                                                                                                                                           |
| SraP<br>(SasA)                        | MSGQSISDSTSTMSGSTSTSESNSMHPSDSMSMHHTHSTSTSRLSSEATTST<br>SESQSTLSATSEVTKHNGTPAQSEKR                                                                                                                                                        |
| FmtB<br>(SasB)                        | NNKATQNDGANASPATVSNNGSANSANQDMLNVTNTDDHQAKTKSAQQGKVNKAK<br>QQAKT                                                                                                                                                                          |
| SasC                                  | DTAIGQIDQDRSNAQVDKTASLNLQTIHDLVDVHPIKPKDAEKTINDDLARVTALVQN<br>YRKVSDRNKADALKAITALKLQMDDELKTARTNADVDAVLKRFNVALSDIEAVITEK<br>ENSLLRIDNIAQQTYAKFKAIATPEQLAKVKVLIDQYVADGNRMIDEDATLNDIKQH<br>TQFIVDEILAIKLPAEATKVSPKEIQPAPKVCTPIKKEETHESRKVEKE |

<sup>a</sup> The Aap sequence listed here is based on the consensus identification of the LCR region by the PlaToLoCo server<sup>9</sup>, as for all other sequences in Table 5. This sequence differs slightly from the Aap construct used for experimental approaches (compare to Figure 1).

## References

1. Holehouse AS, Das RK, Ahad JN, Richardson MO, Pappu RV. CIDER: Resources to Analyze Sequence-Ensemble Relationships of Intrinsically Disordered Proteins. *Biophys J* **112**, 16-21 (2017).
2. Das RK, Pappu RV. Conformations of intrinsically disordered proteins are influenced by linear sequence distributions of oppositely charged residues. *Proc Natl Acad Sci U S A* **110**, 13392-13397 (2013).
3. Sawle L, Ghosh K. A theoretical method to compute sequence dependent configurational properties in charged polymers and proteins. *The Journal of chemical physics* **143**, 085101 (2015).
4. Martin EW, Holehouse AS, Grace CR, Hughes A, Pappu RV, Mittag T. Sequence Determinants of the Conformational Properties of an Intrinsically Disordered Protein Prior to and upon Multisite Phosphorylation. *J Am Chem Soc* **138**, 15323-15335 (2016).
5. Kyte J, Doolittle RF. A simple method for displaying the hydrophobic character of a protein. *J Mol Biol* **157**, 105-132 (1982).
6. Tomasso ME, Tarver MJ, Devarajan D, Whitten ST. Hydrodynamic Radii of Intrinsically Disordered Proteins Determined from Experimental Polyproline II Propensities. *PLoS computational biology* **12**, e1004686 (2016).

7. English LR, Tilton EC, Ricard BJ, Whitten ST. Intrinsic alpha helix propensities compact hydrodynamic radii in intrinsically disordered proteins. *Proteins* **85**, 296-311 (2017).
8. Yarawsky AE, English LR, Whitten ST, Herr AB. The Proline/Glycine-Rich Region of the Biofilm Adhesion Protein Aap Forms an Extended Stalk that Resists Compaction. *J Mol Biol* **429**, 261-279 (2017).
9. Jarnot P, *et al.* PlaToLoCo: the first web meta-server for visualization and annotation of low complexity regions in proteins. *Nucleic Acids Res* **48**, W77-W84 (2020).
